# Supplementary material for: Towards textile metamaterials: a pathway to auxeticity and tensegrity in a needle-punched nonwoven stiff felt
Source: Royal Society of Chemistry journal article supplement (doi:10.1039/d2ma00405d), 2022-01-01
Supplement: d2ma00405d1.pdf [file d2ma00405d1.pdf]

## Supporting Information

### **Towards textile metamaterials: A pathway to auxeticity and tensegrity in a needle-punched nonwoven stiff felt**

*Prateek Verma, Casey L. Smith, Anselm C. Griffin, and Meisha L. Shofner\**

*School of Materials Science and Engineering, Georgia Institute of Technology, 801 Ferst Drive,  
Atlanta, GA 30332-0295, USA*

*\*Corresponding Author: [meisha.shofner@mse.gatech.edu](mailto:meisha.shofner@mse.gatech.edu)*

## Differential Scanning Calorimetry (DSC)

DSC was performed on a Discovery DSC instrument by TA Instruments. About 10 mg stiff felt was cut and used with aluminum DSC pan. The instrument was programmed to (1) equilibrate at -30 °C, (2) stay isothermal for 5 mins, (3) heat at 10 °C/min to 200 °C, (4) stay isothermal for 5 mins, (5) cool at 10 °C/min to -30.00 °C, (6) stay isothermal for 5 mins and (7) heat again at 10 °C/min to 200 °C.

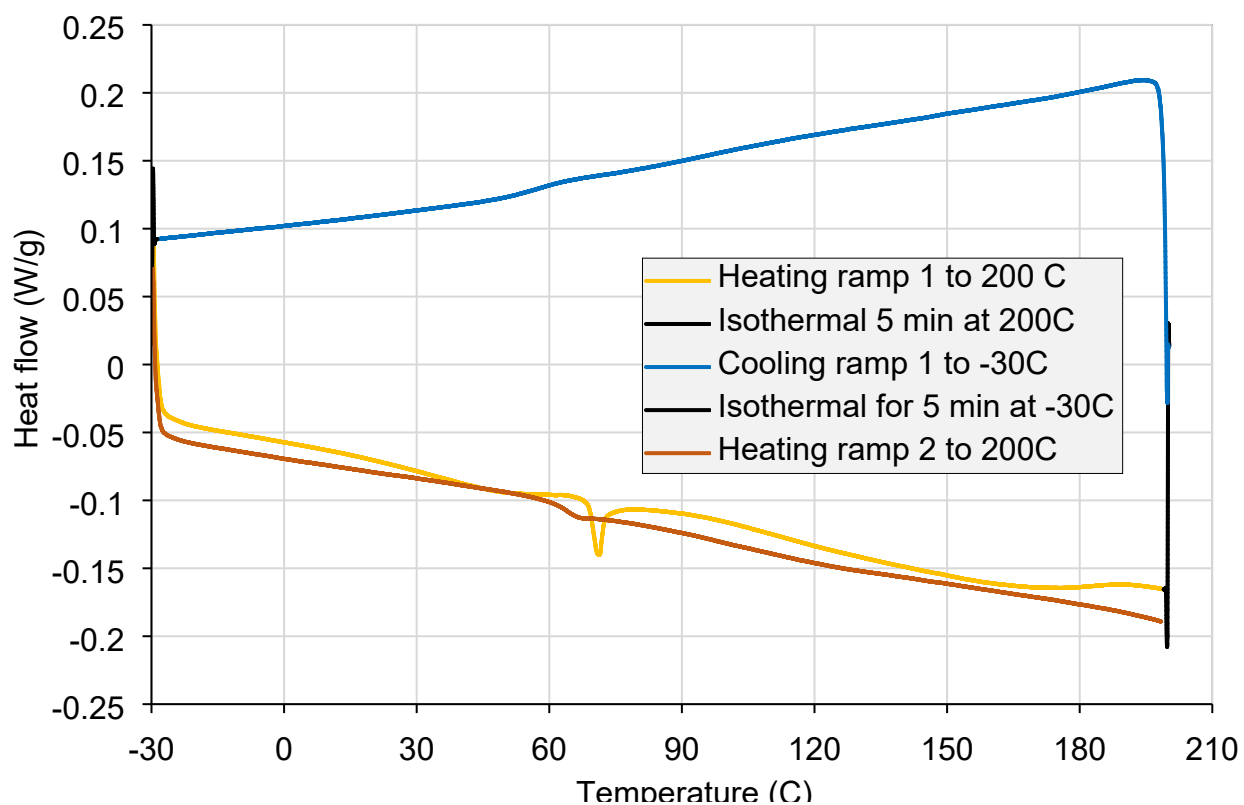

**Figure S1.** DSC data for an as-received (AR) stiff felt sample.

## Adjusted stress-strain data for reversibility experiment

Stress-strain data for treated stiff felt specimens for the loading step over five cycles have been shown below. Stress data were adjusted by shifting stress values vertically by a constant value to have the stress at 0% strain to be 0 kPa, allowing for easier comparison between cycles. Included table shows the amount by which the stress values were shifted up.

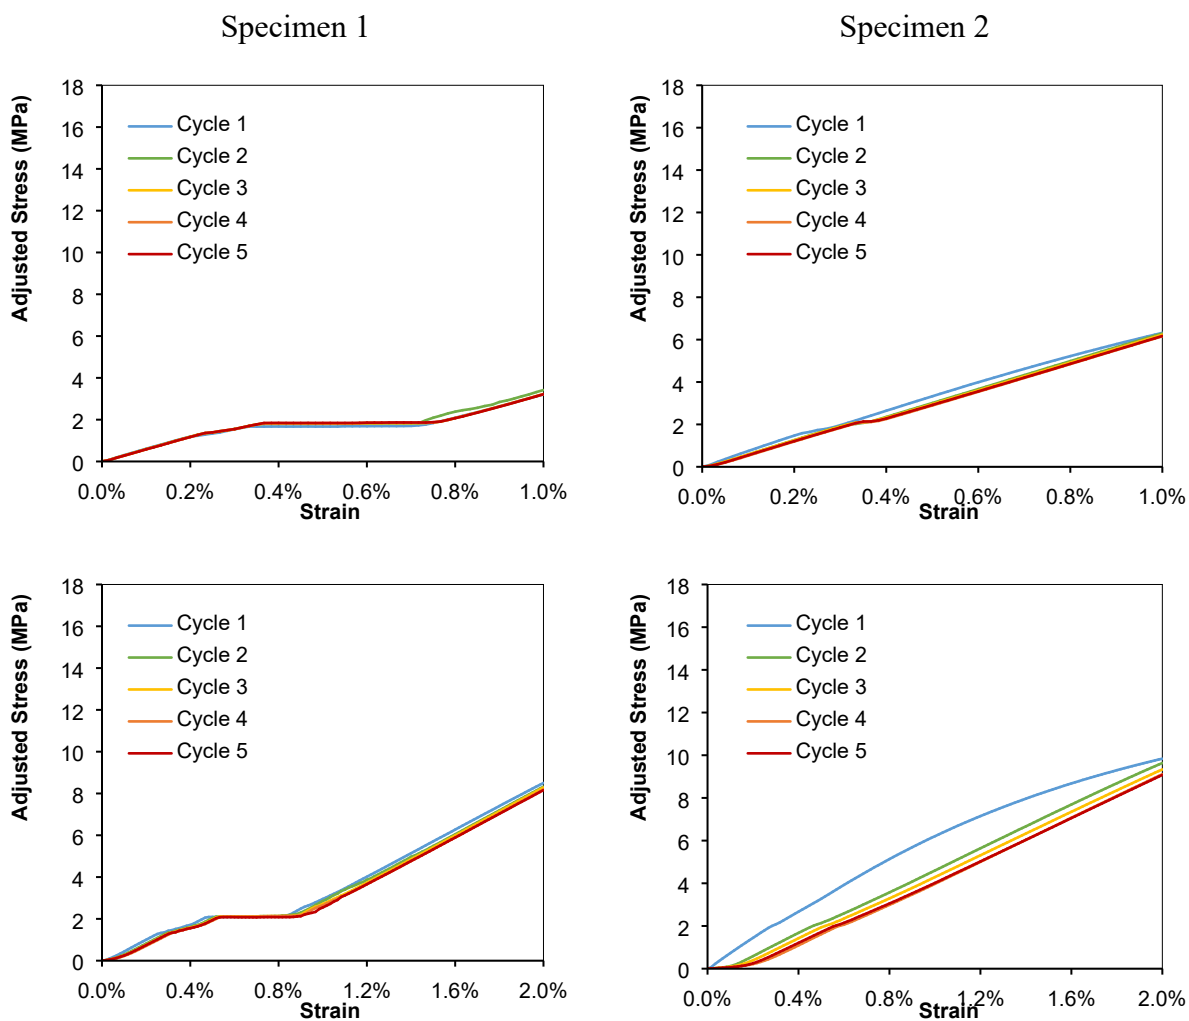

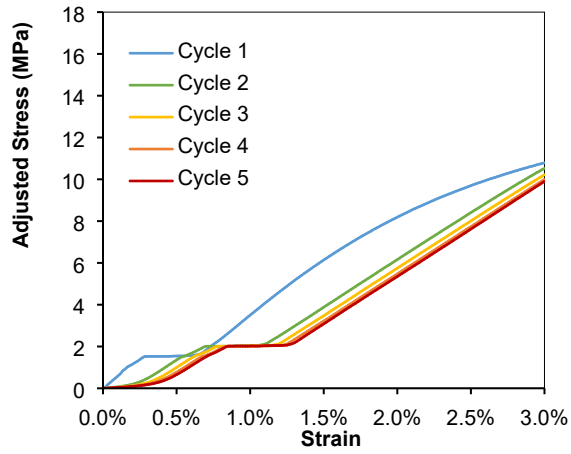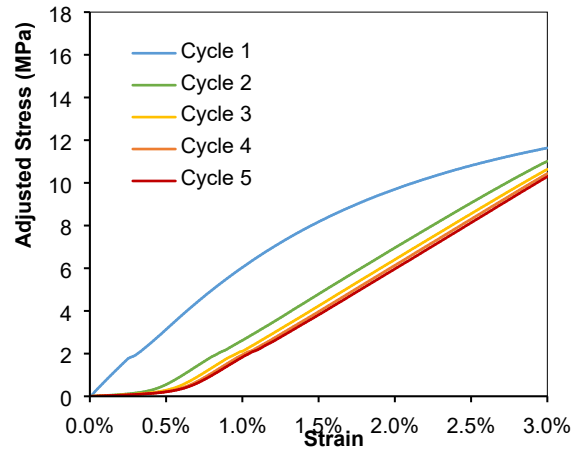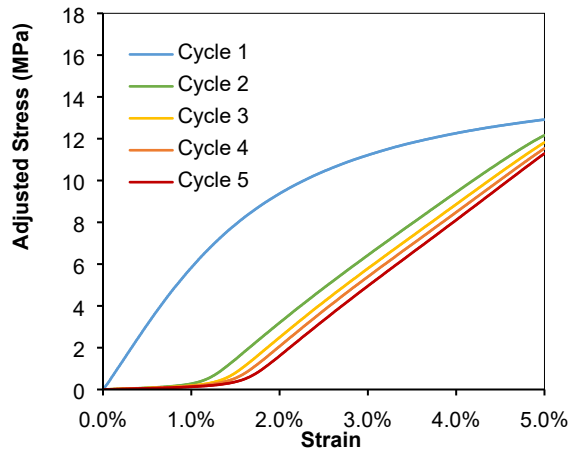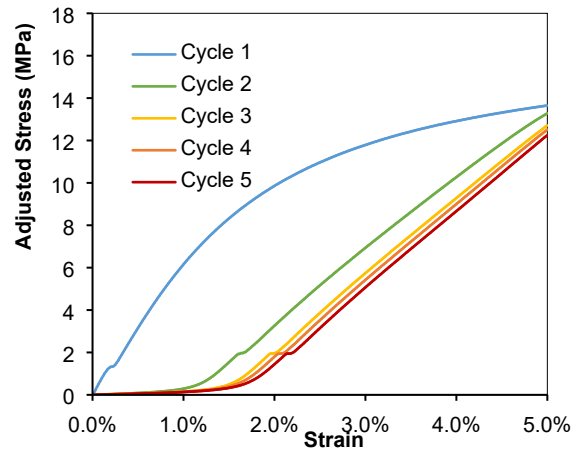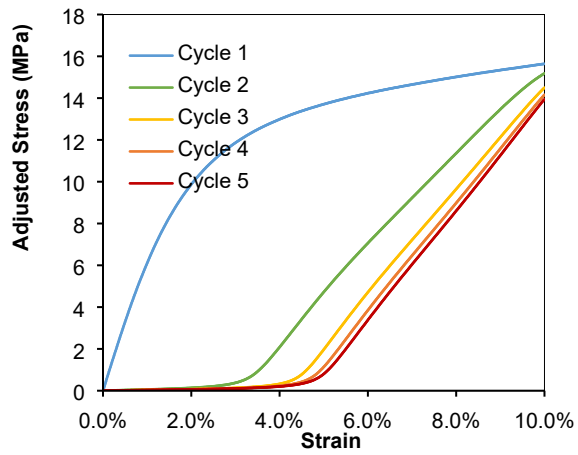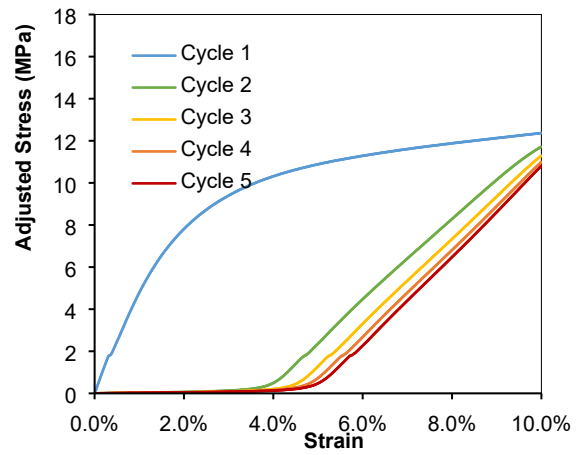

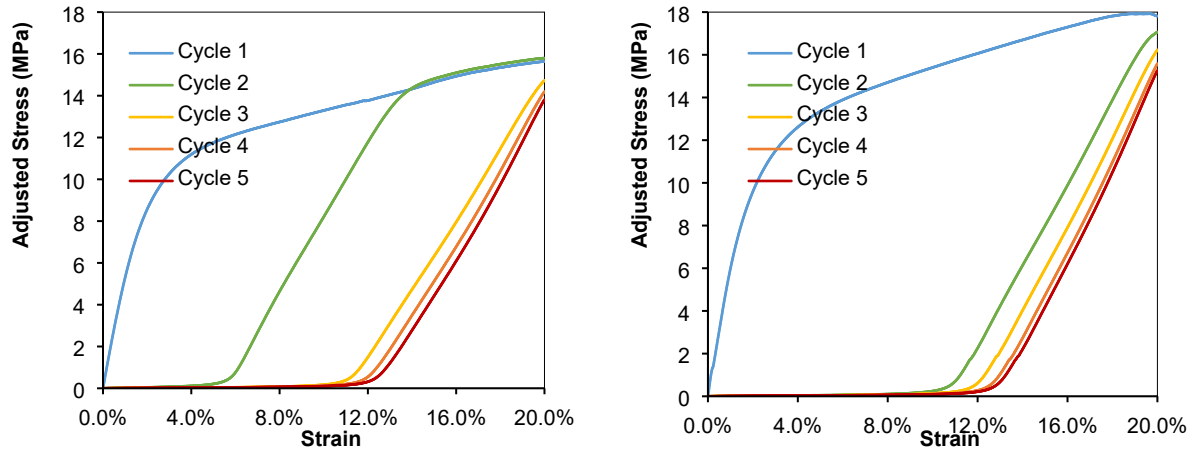

| <b>Specimen 1 (left)</b> | magnitude of stress (kPa) shifted vertically up |           |           |           |            |            |
|--------------------------|-------------------------------------------------|-----------|-----------|-----------|------------|------------|
| Max. axial strain →      | <b>1%</b>                                       | <b>2%</b> | <b>3%</b> | <b>5%</b> | <b>10%</b> | <b>20%</b> |
| Cycle 1                  | 2.6                                             | 619.1     | -36.0     | 17.1      | 31.4       | 53.1       |
| Cycle 2                  | 135.4                                           | 632.2     | 475.1     | 183.6     | 409.6      | 441.3      |
| Cycle 3                  | 148.9                                           | 635.7     | 467.9     | 186.9     | 410.3      | 425.1      |
| Cycle 4                  | 167.0                                           | 630.8     | 467.5     | 185.5     | 415.4      | 428.1      |
| Cycle 5                  | 177.4                                           | 629.9     | 468.1     | 185.7     | 415.3      | 428.4      |

| <b>Specimen 2 (right)</b> | magnitude of stress (kPa) shifted vertically up |           |           |           |            |            |
|---------------------------|-------------------------------------------------|-----------|-----------|-----------|------------|------------|
| Max. axial strain →       | <b>1%</b>                                       | <b>2%</b> | <b>3%</b> | <b>5%</b> | <b>10%</b> | <b>20%</b> |
| Cycle 1                   | -1.1                                            | 17.1      | 0.1       | 0.3       | -1.2       | -0.4       |
| Cycle 2                   | 207.2                                           | 421.2     | 245.1     | 653.3     | 73.5       | 544.6      |
| Cycle 3                   | 252.0                                           | 364.1     | 233.1     | 662.3     | 74.3       | 546.8      |
| Cycle 4                   | 244.0                                           | 308.8     | 235.2     | 662.8     | 75.7       | 547.4      |
| Cycle 5                   | 284.6                                           | 384.7     | 245.4     | 655.2     | 76.6       | 548.1      |

**Figure S2.** Adjusted stress-strain data for treated stiff felt specimens (TR70) for the loading step over five cycles; plots correspond to the maximum axial strain of either 1, 2, 3, 5, 10 or 20% achieved during the reversibility experiments. Stress values in the plots are shown in MPa. Included tables show the magnitude by which the stress values (shown in kPa) were shifted.
